# Supplementary material for: Low-Voltage Ligand-to-Metal Charge Transfer in LixCoO2
Source: Research Square preprint supplement (doi:10.21203/rs.3.rs-7272914/v1), 2025-09-22
Supplement: Supplementary file 1 [file 958026364528122513ad4779.docx]

**Supporting Information for:**

**Phase Transition Induced Ligand-to-Metal Charge Transfer in LixCoO2**

Abiram Krishnan1, Sang-Jun Lee2, Hirohito Ogasawara2, and Faisal M Alamgir1*

1School of Materials Science and Engineering, Georgia Institute of Technology, Atlanta, Georgia 30332, United States

2Stanford Synchrotron Radiation Lightsource, SLAC National Accelerator Laboratory, Menlo Park, California 94025, United States

Corresponding Author

[*faisal.alamgir@mse.gatech.edu](mailto:*faisal.alamgir@mse.gatech.edu)


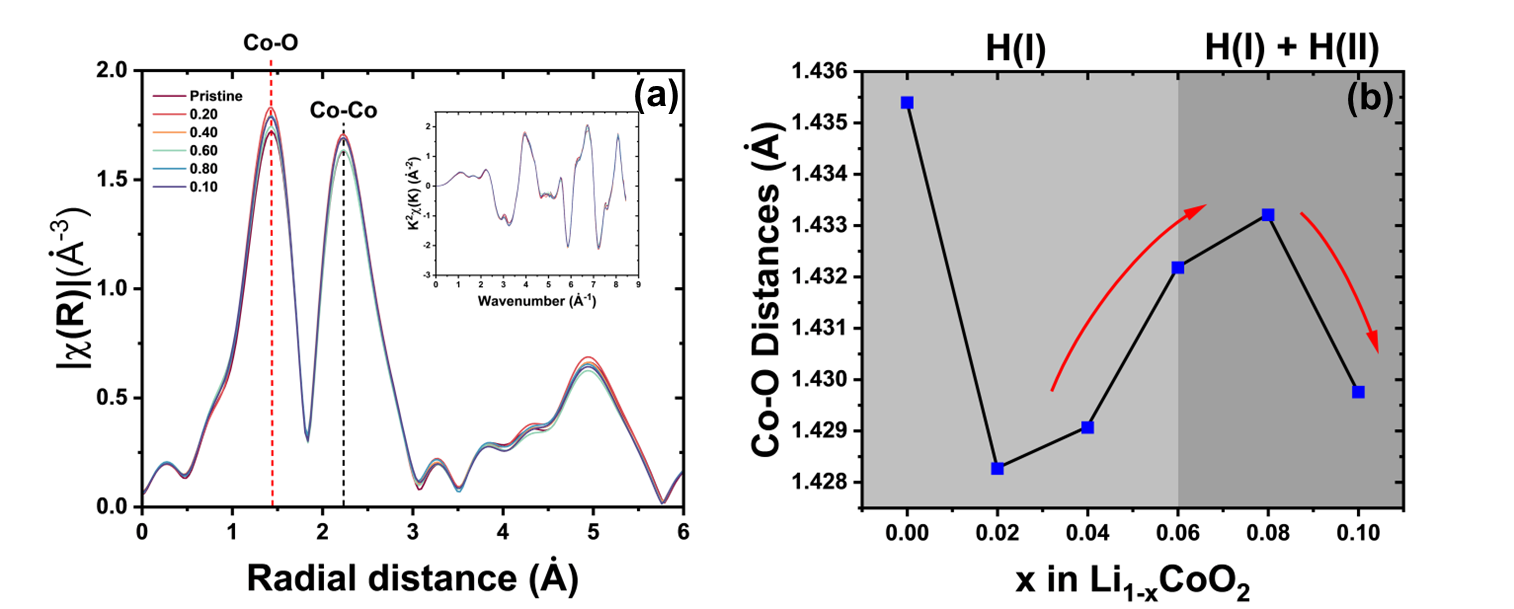


**Figure S1: (a) :** EXAFS R-space for ex-situ LCO samples (K-space included in the inset) used to determine **(b)** Co-O interatomic distances. The Co-O distances are found to increase during the formation of H(II) phase, indicating reduction of cobalt ions in LCO. The range of the Hanning window used for R-space calculation is between 2 to 8.5 Å-1.


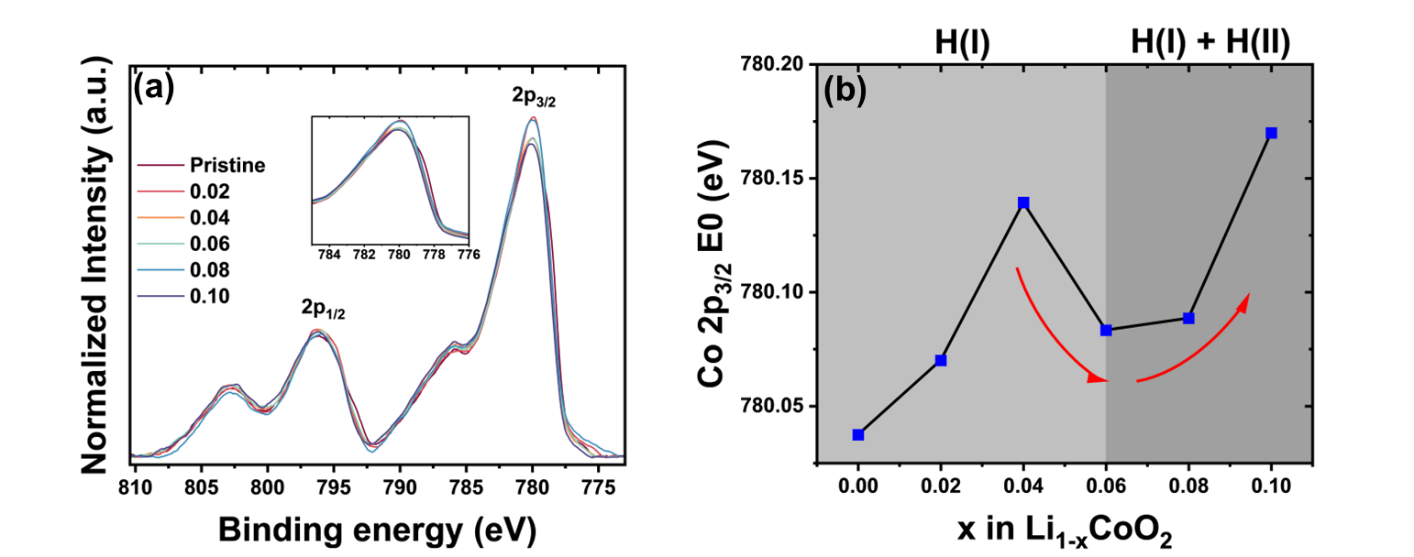


**Figure S2: (a)** Normalized Co 2p x-ray photoelectron spectra for LCO samples. The binding energy of Co 2p3/2 orbitals is found to decrease during the formation of H(II) phase, marking reduction of cobalt ions in LCO.


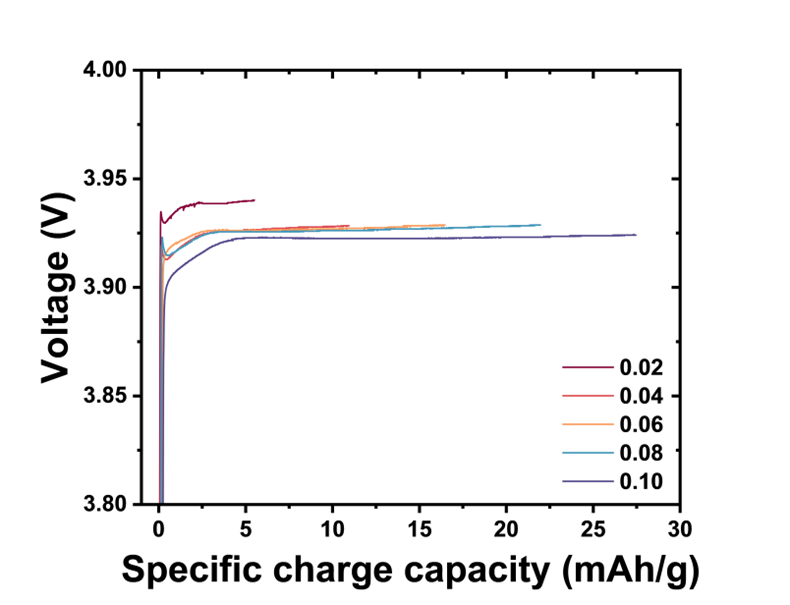


**Figure S3:** Voltage profiles for ex-situ samples of Li1-xCoO2 prepared using a constant current corresponding to a slow C-rate of C/50.


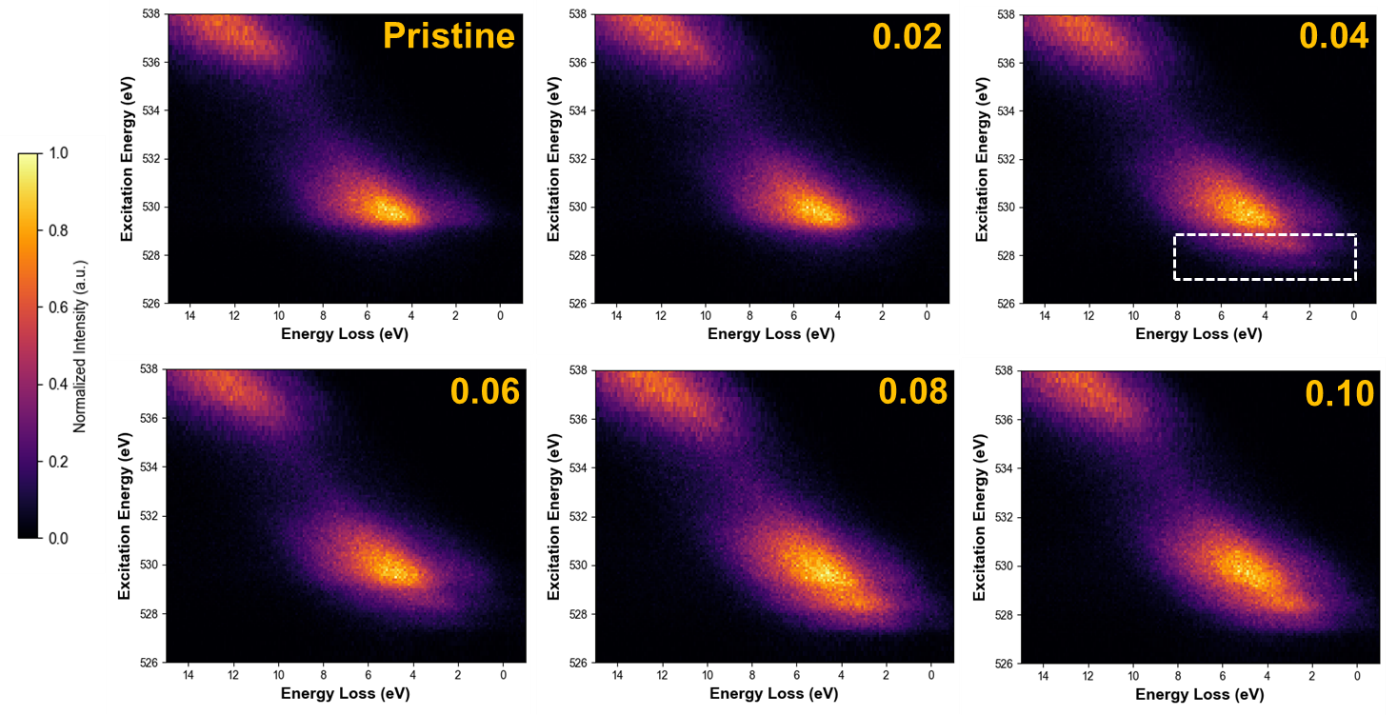


**Figure S4:** O K-edge RIXS maps of Li1-xCoO2 during the initial growth of H(II) phase. The shoulder marked at lower excitation energies indicates the formation of delocalize O 2p electron during phase change.


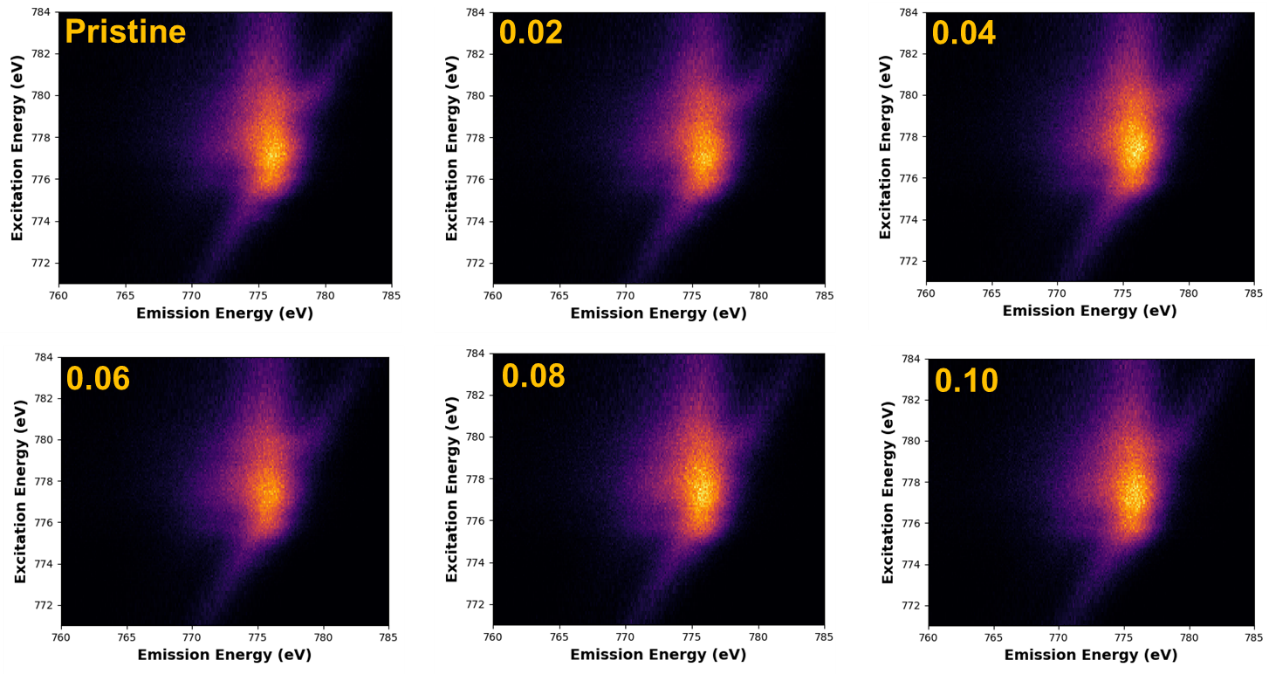


**Figure S5:** Co L3 RIXS maps of Li1-xCoO2 during the start of the two-phase region. These maps are used to obtain the difference plots for further analysis.
